# Supplementary material for: Association of the MDM2 SNP285 and SNP309 Genetic Variants with the Risk, Age at Onset and Prognosis of Breast Cancer in Central European Women: A Hospital-Based Case-Control Study
Source: PubMed Central journal article supplement (PMC6387136; doi:10.3390/ijms20030509), 2019-01-25
Supplement: ijms-20-00509-s001.pdf [file ijms-20-00509-s001.pdf]

**Table S1.** Clinical characteristics and genotype frequencies of SNP309 in the study population.

|                   |           | Total | SNP309 genotype |             |            |
|-------------------|-----------|-------|-----------------|-------------|------------|
|                   |           |       | TT              | TG          | GG         |
| All subjects      |           | 660   | 274 (41,5%)     | 300 (45,5%) | 86 (13,0%) |
| Patients          |           | 406   | 169 (41,6%)     | 178 (43,8%) | 59 (14,5%) |
| Controls          |           | 254   | 105 (41,3%)     | 122 (48,0%) | 27 (10,6%) |
| Age (years)       | <55       | 171   | 76 (44,4%)      | 74 (43,3%)  | 21 (12,3%) |
|                   | ≥55       | 235   | 93 (39,6%)      | 104 (44,3%) | 38 (16,2%) |
| Menopausal status | pre       | 100   | 46 (46,0%)      | 40 (40,0%)  | 14 (14,0%) |
|                   | post      | 250   | 100 (40,0%)     | 111 (44,4%) | 39 (15,6%) |
|                   | na        | 56    | 23 (41,1%)      | 27 (48,2%)  | 6 (10,7%)  |
| p53 status        | pos       | 92    | 47 (51,1%)      | 38 (41,3%)  | 7 (7,6%)   |
|                   | neg       | 259   | 104 (40,2%)     | 109 (42,1%) | 46 (17,8%) |
|                   | na        | 55    | 18 (32,7%)      | 31 (56,4%)  | 6 (10,9%)  |
| ER status         | pos       | 265   | 117 (44,2%)     | 111 (41,9%) | 37 (14,0%) |
|                   | neg       | 124   | 50 (40,3%)      | 54 (43,5%)  | 20 (16,1%) |
|                   | na        | 17    | 2 (11,8%)       | 13 (76,5%)  | 2 (11,8%)  |
| PR status         | pos       | 185   | 81 (43,8%)      | 76 (41,1%)  | 28 (15,1%) |
|                   | neg       | 198   | 82 (41,4%)      | 87 (43,9%)  | 29 (14,6%) |
|                   | na        | 23    | 6 (26,1%)       | 15 (65,2%)  | 2 (8,7%)   |
| HER2 status       | pos       | 74    | 32 (43,2%)      | 31 (41,9%)  | 11 (14,9%) |
|                   | neg       | 296   | 125 (42,2%)     | 129 (43,6%) | 42 (14,2%) |
|                   | na        | 36    | 12 (33,3%)      | 18 (50,0%)  | 6 (16,7%)  |
| KI67 pos cells    | ≤10%      | 183   | 82 (44,8%)      | 74 (40,4%)  | 27 (14,8%) |
|                   | >10%      | 125   | 49 (39,2%)      | 53 (42,4%)  | 23 (18,4%) |
|                   | na        | 98    | 38 (38,8%)      | 51 (52,0%)  | 9 (9,2%)   |
| Stage             | 0, I      | 143   | 59 (41,3%)      | 68 (47,6%)  | 16 (11,2%) |
|                   | II-IV     | 186   | 83 (44,6%)      | 73 (39,2%)  | 30 (16,1%) |
|                   | na        | 77    | 27 (35,1%)      | 37 (48,1%)  | 13 (16,9%) |
| Grade             | pG1-2     | 237   | 96 (40,5%)      | 104 (43,9%) | 37 (15,6%) |
|                   | pG3       | 146   | 65 (44,5%)      | 61 (41,8%)  | 20 (13,7%) |
|                   | na        | 23    | 8 (34,8%)       | 13 (56,5%)  | 2 (8,7%)   |
| Tumor size        | pT1       | 175   | 81 (46,3%)      | 73 (41,7%)  | 21 (12,0%) |
|                   | pT2-4     | 158   | 64 (40,5%)      | 68 (43,0%)  | 26 (16,5%) |
|                   | other, na | 73    | 24 (32,9%)      | 37 (50,7%)  | 12 (16,4%) |
| Tumor type        | ductal    | 248   | 107 (43,1%)     | 108 (43,5%) | 33 (13,3%) |
|                   | lobular   | 80    | 35 (43,8%)      | 32 (40,0%)  | 13 (16,3%) |
|                   | other, na | 78    | 27 (34,6%)      | 38 (48,7%)  | 13 (16,7%) |
| Lymph node status | pN0       | 195   | 86 (44,1%)      | 87 (44,6%)  | 22 (11,3%) |
|                   | pN+       | 132   | 57 (43,2%)      | 55 (41,7%)  | 20 (15,2%) |
|                   | na        | 79    | 26 (32,9%)      | 36 (45,6%)  | 17 (21,5%) |

Numbers of all patients and controls, as well as number of patients in the indicated subgroups are shown. Parenthesized numbers show the fraction of patients (%) with the indicated genotypes. ER, estrogen receptor; PR, progesterone receptor; na, status not available.

**Table S2.** Clinical characteristics and genotype frequencies of SNP285 in the study population.

|                   |           | Total | SNP285 genotype |    |        |
|-------------------|-----------|-------|-----------------|----|--------|
|                   |           |       | GG              | GC |        |
| All subjects      |           | 660   | 625 (94,7%)     | 35 | (5,3%) |
| Patients          |           | 406   | 383 (94,3%)     | 23 | (5,7%) |
| Controls          |           | 254   | 242 (95,3%)     | 12 | (4,7%) |
| Age (years)       | <55       | 171   | 160 (93,6%)     | 11 | (6,4%) |
|                   | ≥55       | 235   | 223 (94,9%)     | 12 | (5,1%) |
| Menopausal status | pre       | 100   | 93 (93,0%)      | 7  | (7,0%) |
|                   | post      | 250   | 239 (95,6%)     | 11 | (4,4%) |
|                   | na        | 56    | 51 (91,1%)      | 5  | (8,9%) |
| p53 status        | pos       | 92    | 89 (96,7%)      | 3  | (3,3%) |
|                   | neg       | 259   | 241 (93,1%)     | 18 | (6,9%) |
|                   | na        | 55    | 53 (96,4%)      | 2  | (3,6%) |
| ER status         | pos       | 265   | 250 (94,3%)     | 15 | (5,7%) |
|                   | neg       | 124   | 116 (93,5%)     | 8  | (6,5%) |
|                   | na        | 17    | 17 (100,0%)     | 0  | (0,0%) |
| PR status         | pos       | 185   | 173 (93,5%)     | 12 | (6,5%) |
|                   | neg       | 198   | 187 (94,4%)     | 11 | (5,6%) |
|                   | na        | 23    | 23 (100,0%)     | 0  | (0,0%) |
| HER2 status       | pos       | 74    | 70 (94,6%)      | 4  | (5,4%) |
|                   | neg       | 296   | 278 (93,9%)     | 18 | (6,1%) |
|                   | na        | 36    | 35 (97,2%)      | 1  | (2,8%) |
| KI67 pos cells    | ≤10%      | 183   | 176 (96,2%)     | 7  | (3,8%) |
|                   | >10%      | 125   | 113 (90,4%)     | 12 | (9,6%) |
|                   | na        | 98    | 94 (95,9%)      | 4  | (4,1%) |
| Stage             | 0, I      | 143   | 137 (95,8%)     | 6  | (4,2%) |
|                   | II-IV     | 186   | 175 (94,1%)     | 11 | (5,9%) |
|                   | na        | 77    | 71 (92,2%)      | 6  | (7,8%) |
| Grade             | pG1-2     | 237   | 222 (93,7%)     | 15 | (6,3%) |
|                   | pG3       | 146   | 138 (94,5%)     | 8  | (5,5%) |
|                   | na        | 23    | 23 (100,0%)     | 0  | (0,0%) |
| Tumor size        | pT1       | 175   | 166 (94,9%)     | 9  | (5,1%) |
|                   | pT2-4     | 158   | 148 (93,7%)     | 10 | (6,3%) |
|                   | other, na | 73    | 69 (94,5%)      | 4  | (5,5%) |
| Tumor type        | ductal    | 248   | 235 (94,8%)     | 13 | (5,2%) |
|                   | lobular   | 80    | 77 (96,3%)      | 3  | (3,8%) |
|                   | other, na | 78    | 71 (91,0%)      | 7  | (9,0%) |
| Lymph node status | pN0       | 195   | 185 (94,9%)     | 10 | (5,1%) |
|                   | pN+       | 132   | 124 (93,9%)     | 8  | (6,1%) |
|                   | na        | 79    | 74 (93,7%)      | 5  | (6,3%) |

Numbers of all patients and controls, as well as number of patients in the indicated subgroups are shown. Parenthesized numbers show the fraction of patients (%) with the indicated genotypes. The column “SNP285 CC” was omitted since none of the subjects exhibited this genotype. ER, estrogen receptor; PR, progesterone receptor; na, status not available.

**Table S3.** Association of *MDM2* SNP309 with breast cancer risk in the dominant inheritance model.

|                          | Patients |             | SNP309 |           |          |
|--------------------------|----------|-------------|--------|-----------|----------|
|                          | Subgr.   | Number (%)  | OR     | 95% CI    | <i>p</i> |
| Age (years) <sup>1</sup> | <55      | 171 (42.1%) | 0.88   | 0.60-1.30 | 0,526    |
|                          | ≥55      | 235 (57.9%) | 1.08   | 0.75-1.54 | 0,691    |
| Menopausal status        | pre      | 100 (28.6%) | 0.83   | 0.52-1.32 | 0,425    |
|                          | post     | 250 (71.4%) | 1.06   | 0.74-1.51 | 0,760    |
| p53 status               | pos      | 92 (26.2%)  | 0.67   | 0.42-1.09 | 0,107    |
|                          | neg      | 259 (73.8%) | 1.05   | 0.74-1.49 | 0,785    |
| ER status                | pos      | 265 (68.1%) | 0.89   | 0.63-1.26 | 0,517    |
|                          | neg      | 124 (31.9%) | 1.04   | 0.67-1.61 | 0,850    |
| PR status                | pos      | 185 (48.3%) | 0.90   | 0.62-1.33 | 0,609    |
|                          | neg      | 198 (51.7%) | 1.00   | 0.68-1.45 | 0,987    |
| HER2 status              | pos      | 74 (20.0%)  | 0.92   | 0.55-1.56 | 0,770    |
|                          | neg      | 296 (80.0%) | 0.96   | 0.69-1.35 | 0,833    |
| Ki67 status              | ≤10%     | 183 (59.4%) | 0.87   | 0.59-1.27 | 0,470    |
|                          | >10%     | 125 (40.6%) | 1.09   | 0.71-1.69 | 0,690    |
| Stage                    | 0 or I   | 143 (43.5%) | 1.00   | 0.66-1.52 | 0,988    |
|                          | II-IV    | 186 (56.5%) | 0.87   | 0.60-1.28 | 0,492    |
| Grade                    | pG1-2    | 237 (61.9%) | 1.04   | 0.72-1.48 | 0,851    |
|                          | pG3      | 146 (38.1%) | 0.88   | 0.58-1.32 | 0,536    |
| Tumor Size               | pT1      | 175 (52.6%) | 0.82   | 0.55-1.21 | 0,310    |
|                          | pT2-4    | 158 (47.4%) | 1.04   | 0.69-1.55 | 0,867    |

SNP309, GG + TG vs. TT (dominant model); Subgr., subgroup of patients; OR, odds ratios; 95% CI, 95% confidence intervals; *p*, *p*-values; pre, pre-menopausal; post, post-menopausal; ER, estrogen receptor; PR, progesterone receptor; pos, positive; and neg, negative; <sup>1</sup> patients aged under 55 years or ≥55 years at diagnosis were compared to control subjects of any age.

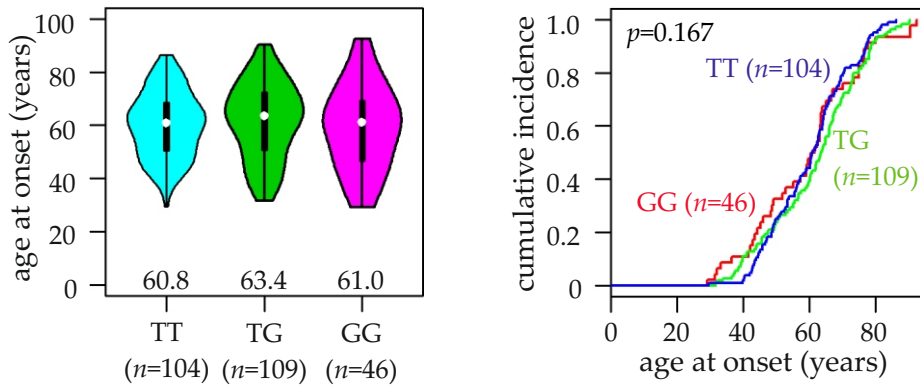

**(a) SNP309 in *TP53* negative patients**

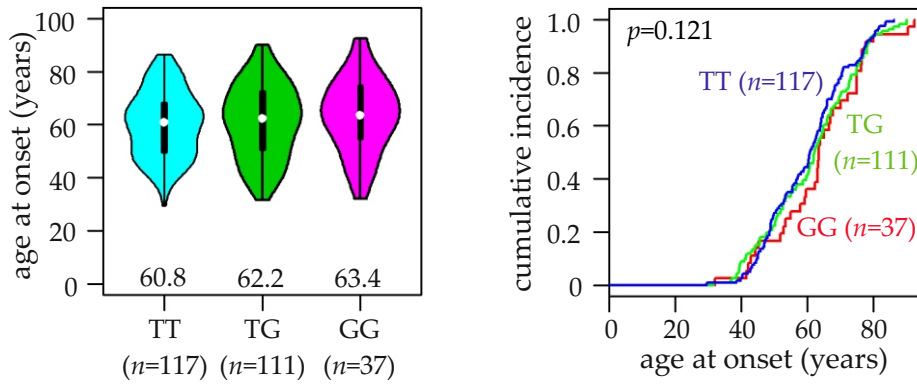

**(b) SNP309 in ER positive patients**

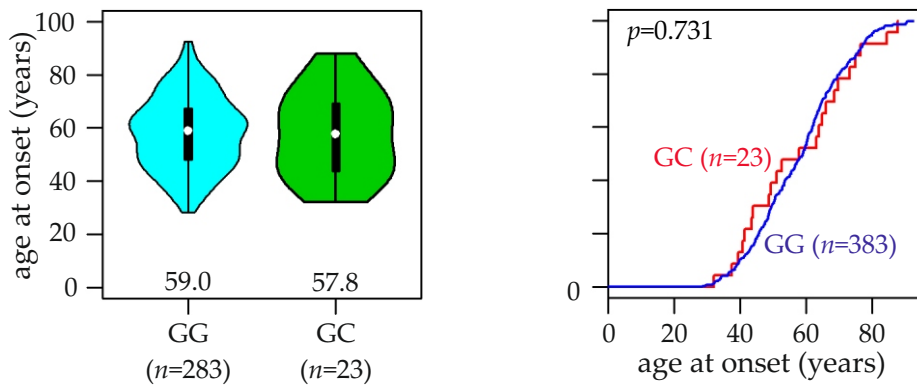

**(c) SNP285 in all patients**

**Figure S1.** Association of SNP309 and SNP285 genotypes with the age at breast cancer onset. Violin plots (left) and curves of the cumulative breast cancer incidence (right) of the indicated age at onset are shown for (a) SNP309 in *TP53* negative patients, (b) SNP309 in estrogen receptor (ER) positive patients, and (c) SNP285 in unselected patients. Genotypes and numbers of patients ( $n$ ) are indicated. Numbers in left panels indicate the median age at breast cancer onset of each genotype (indicated by white dots).
